# Supplementary material for: Vitamin B12b Enhances the Cytotoxicity of Diethyldithiocarbamate in a Synergistic Manner, Inducing the Paraptosis-Like Death of Human Larynx Carcinoma Cells
Source: MDPI journal article supplement (doi:10.3390/biom10010069), 2020-01-01
Supplement: s1 [file s1]

*Article*

# Vitamin B<sub>12</sub> Enhances the Cytotoxicity of Diethyldithiocarbamate in a Synergistic Manner, Inducing the Paraptosis-Like Death of Human Larynx Carcinoma Cells

Marina Solovieva <sup>1</sup>, Yuri Shatalin <sup>1</sup>, Roman Fadeev <sup>1</sup>, Olga Krestinina <sup>1</sup>, Yulia Baburina <sup>1</sup>, Alexey Kruglov <sup>1</sup>, Ekaterina Kharechkina <sup>1</sup>, Margarita Kobyakova <sup>1</sup>, Vadim Rogachevsky <sup>2</sup>, Elena Shishkova <sup>2</sup>, and Vladimir Akatov <sup>1,\*</sup>

<sup>1</sup> Institute of Theoretical and Experimental Biophysics, Russian Academy of Sciences, Pushchino, Moscow region 142290, Russia; m\_solovieva@iteb.ru (M.S.); yury.shatalin@yandex.ru (Y.S.); fadeevrs@gmail.com (R.F.); ovkres@mail.ru (O.K.); byul@rambler.ru (Y.B.); krugalex@rambler.ru (A.K.); katya.kypri@gmail.com (E.K.); ritaaaaa49@gmail.com (M.K.)

<sup>2</sup> Institute of Cell Biophysics, Russian Academy of Sciences, Pushchino, Moscow region 142290, Russia; vadim\_rogachevsky@synapsis.ru (V.R.); shishkova@neuro.nnov.ru (E.S.)

\* Correspondence: akatov.vladimir@gmail.com; Tel.: +7495-6237467; Fax: +74967-330553

## Supplementary Materials

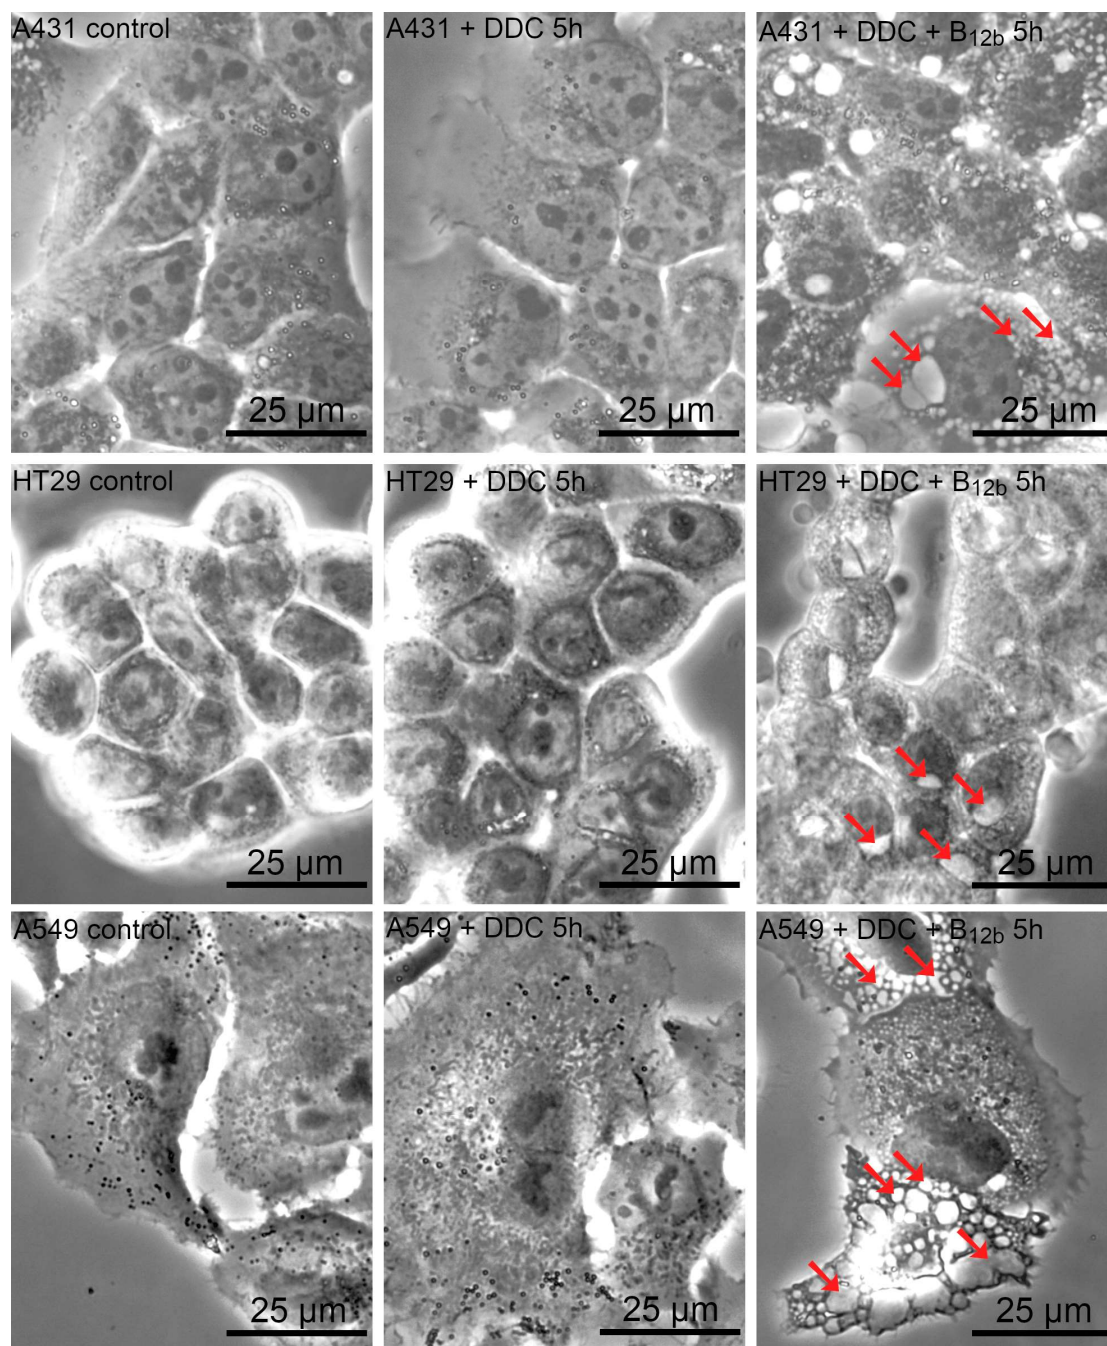

**Figure S1.** Vacuolization of A431, HT29, and A549 cells at the stage of death initiation by the combination of 1 mM DDC + 25 µM B<sub>12b</sub>.

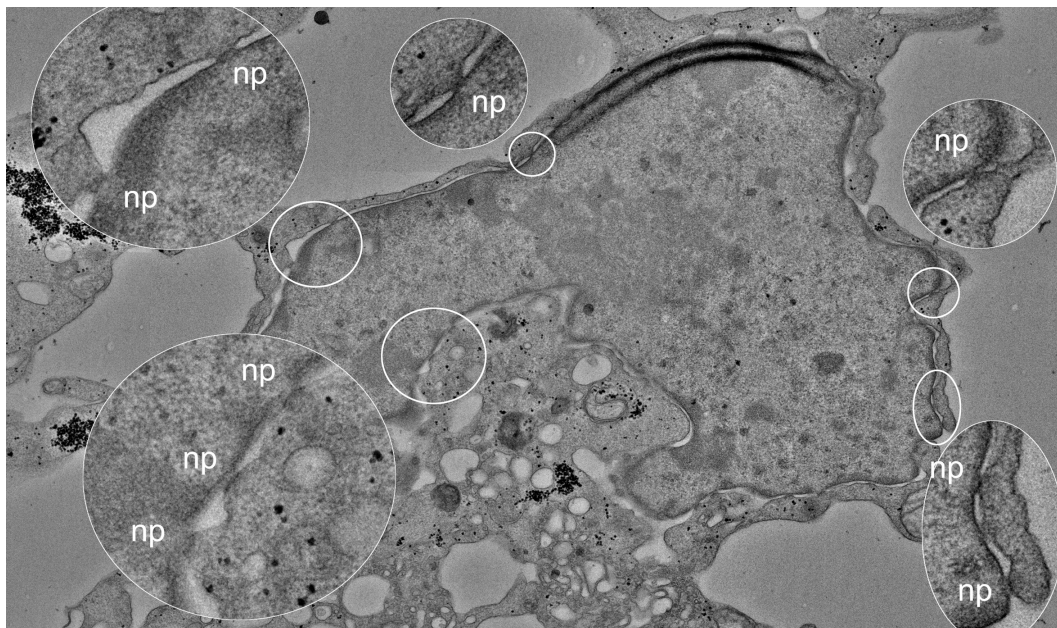

**Figure S2.** Nuclear pores (np) are retained during ER swelling (vacuolization) induced by incubation with DDC + B<sub>12b</sub>.

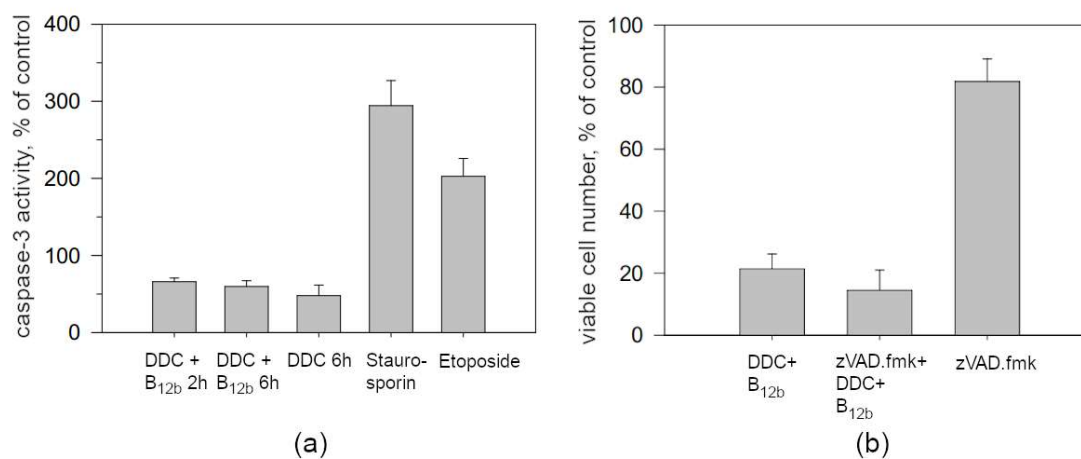

**Figure S3.** The absence of signs of apoptosis during initiation of A549 cell death by a combination of 1 mM DDC with 25  $\mu$ M B<sub>12b</sub>.



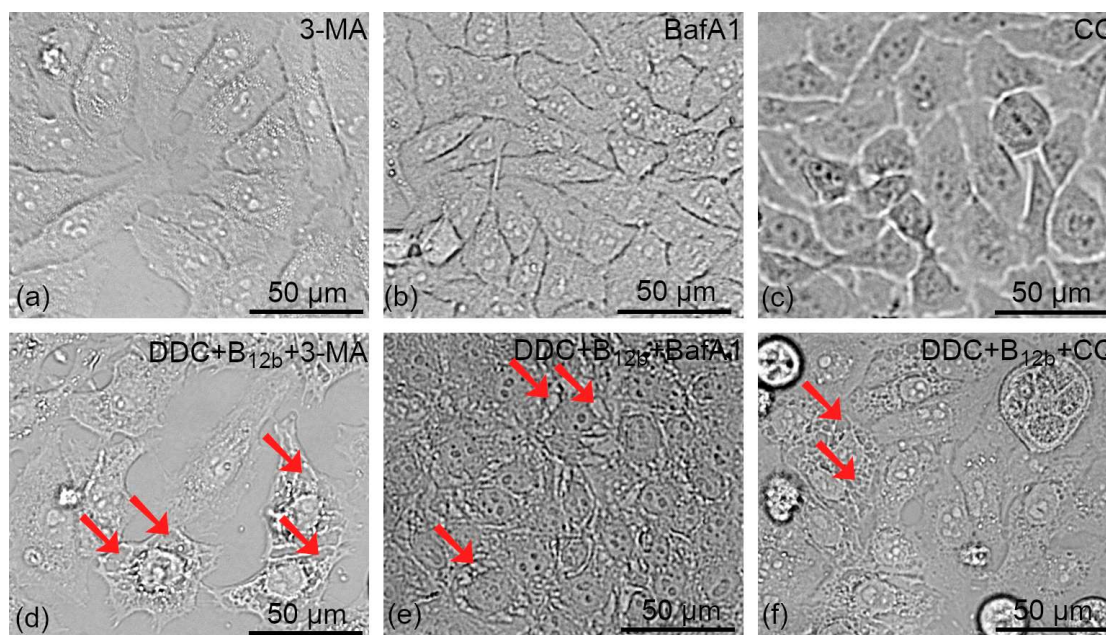

**Figure S4.** Autophagy inhibitors did not protect HEP-2 cells from vacuolization during the 6-h incubation with DDC+B<sub>12b</sub>.

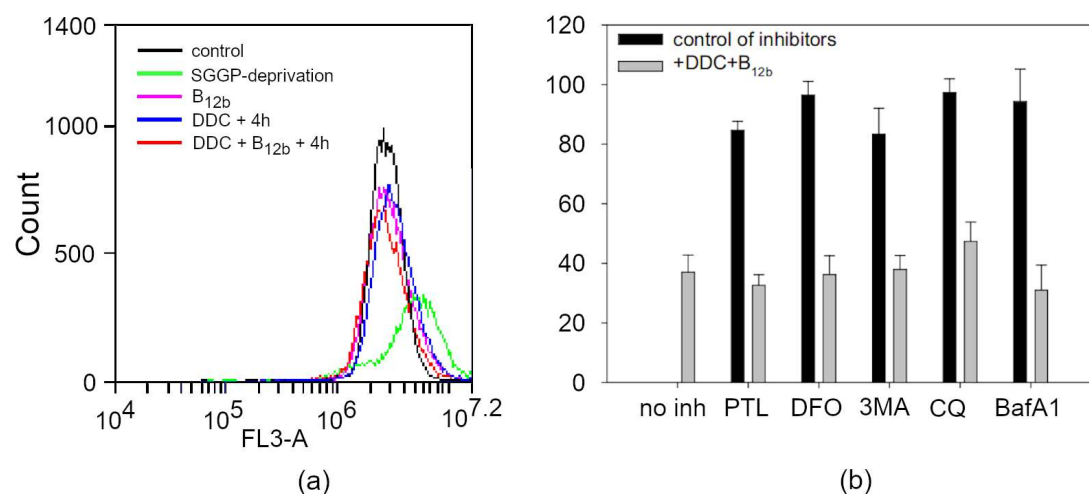

**Figure S5.** Absence of the signs of autophagy and the involvement of lysosomes in the induction of death of A549 cells by the combination 1 mM DDC + 25  $\mu$ M B<sub>12b</sub>.

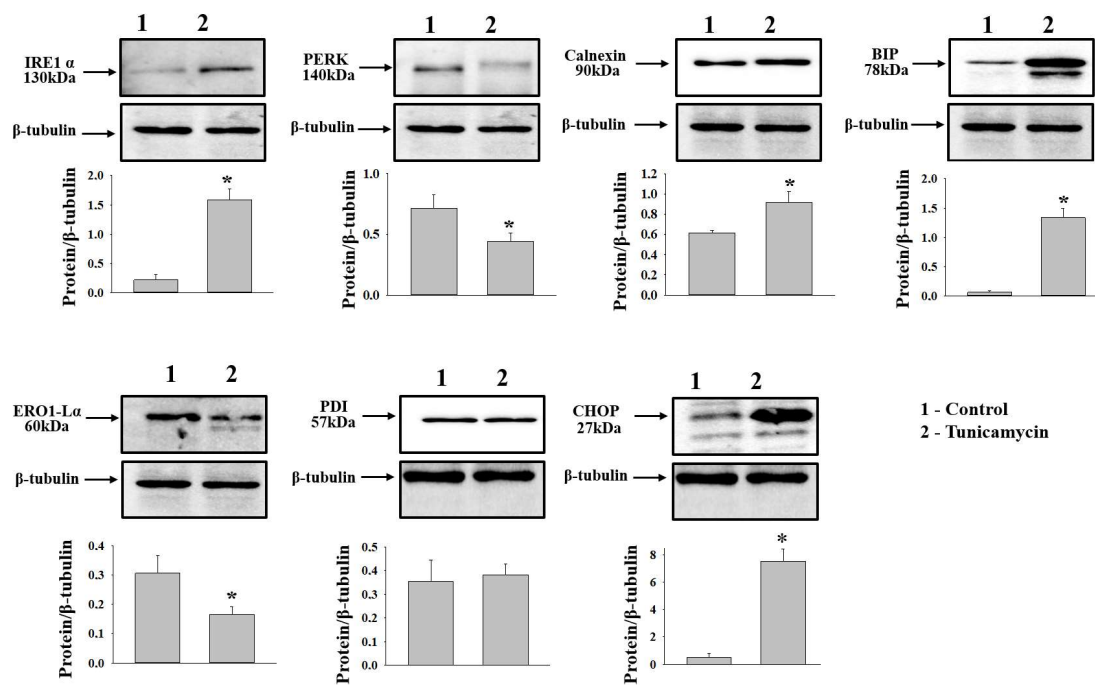

**Figure S6.** Immunoblot analysis of ER-stress markers in HEP-2 cells after 24-h incubation with 2  $\mu$ M tunicamycin.
